# Supplementary material for: Use of the melting curve assay as a means for high-throughput quantification of Illumina sequencing libraries
Source: PeerJ journal article supplement (doi:10.7717/peerj.2281), 2016-08-04

## Supplementary Figure S3

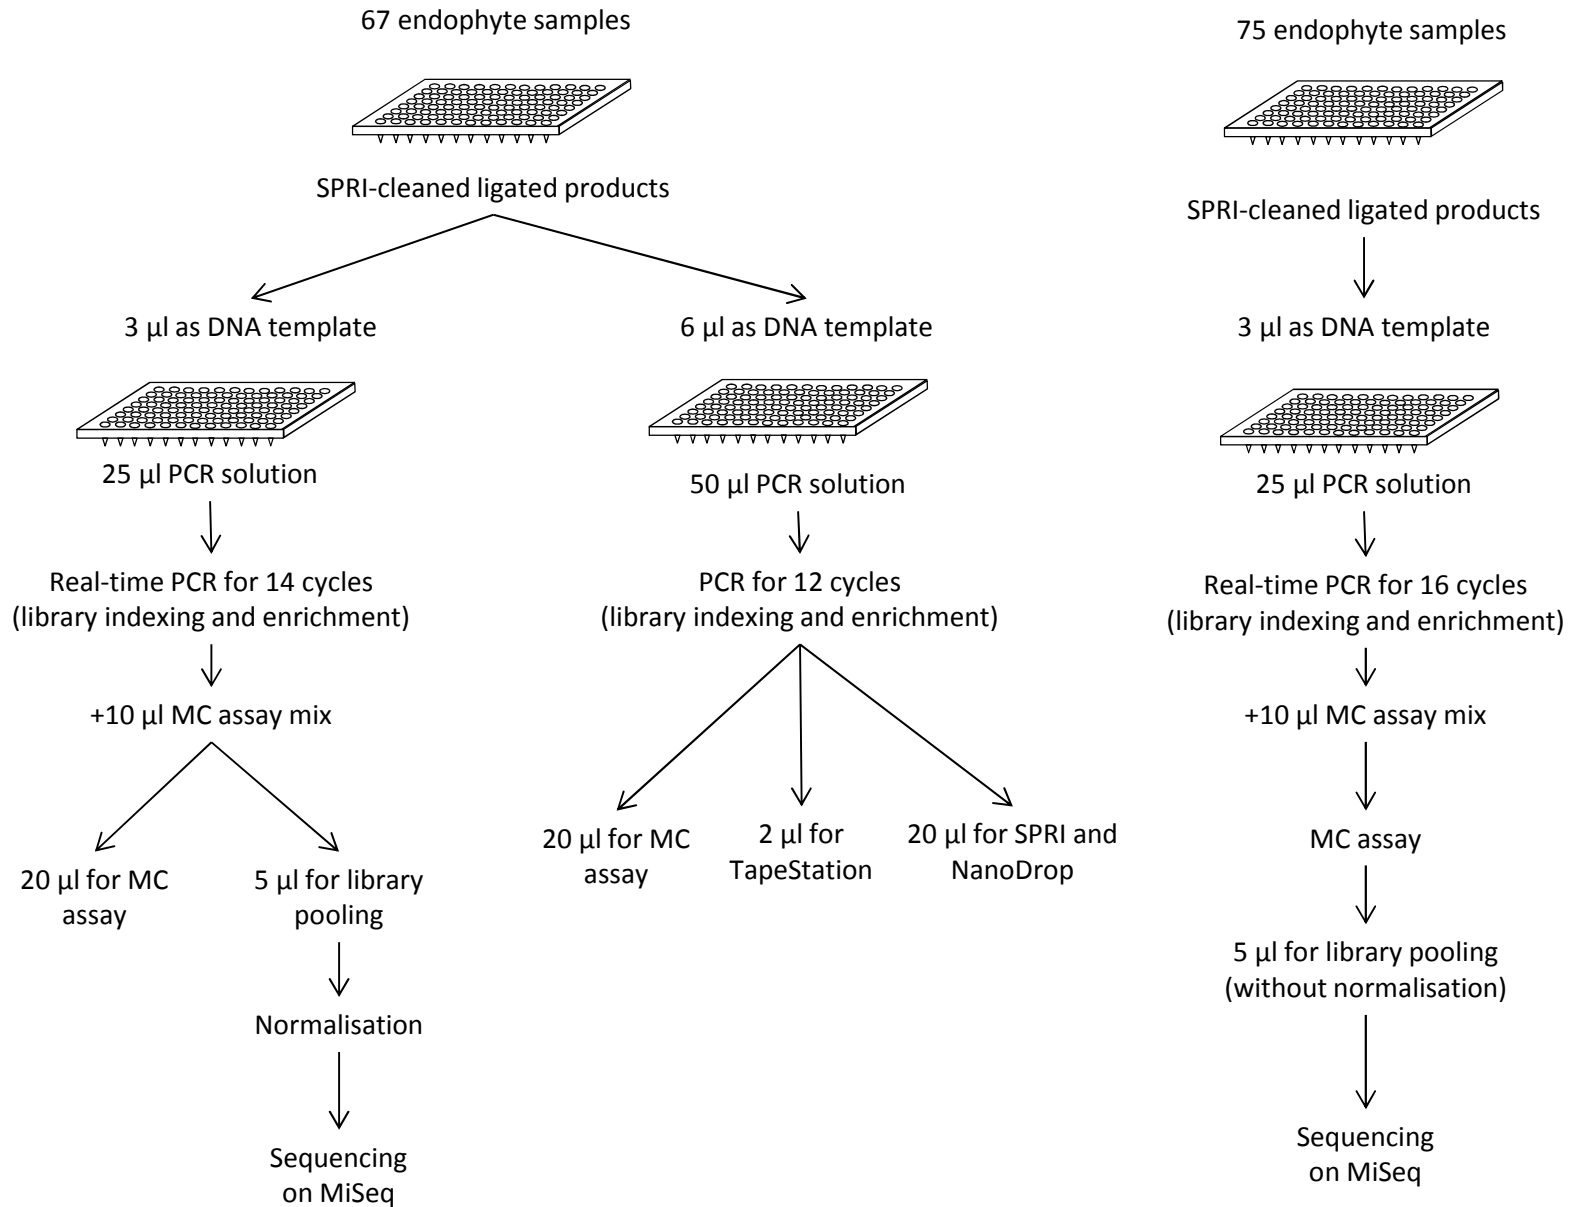

Supplement: PeerJ_MC-based_quantification_Supplementary_Figure_S3.pdf [file PeerJ_MC-based_quantification_Supplementary_Figure_S3.pdf]
