# Supplementary material for: Use of the melting curve assay as a means for high-throughput quantification of Illumina sequencing libraries
Source: PeerJ. 2016 Aug 4;4:e2281. doi: 10.7717/peerj.2281 (PMC4991867; doi:10.7717/peerj.2281)
Supplement: Supplemental Information 1 — Sample unique identifier (e.g., A1) shows location in a 96-well microtiter plate during the MC assay. NTC stands for ’no-template control’. An empty cell in the result of the TapeStation-based method indicates that the DNA amount was below the limit of detection. The NanoDrop-based quantification was not performed for the A5 sample, due to loss of the library sample. [file peerj-04-2281-s009.xlsx]

## Sheet: Melting-curve-Endo-60-admin_201
Method		Sample
MC assay	Temperature	A1	A2	A3	A4	A5	A6	A7	A8	A9	B1	B2	B3	B4	B5	B6	B7	B8	B9	C1	C2	C3	C4	C5	C6	C7	C8	C9	D1	D2	D3	D4	D5	D6	D7	D8	D9-NTC	E1	E2	E3	E4	E5	E6	E7	E8	E9 (NTC)	F1	F2	F3
	75	92.5905	46.8609	50.7634	33.4131	49.072	58.2358	37.2779	5.01915	5.83332	68.5577	52.366	-2.45858	38.0766	39.5332	73.3349	52.8674	4.00111	24.0125	78.4939	55.5364	62.6314	41.2493	26.9413	55.1235	30.1112	58.8034	72.4828	69.7879	50.2792	4.54462	43.6005	7.34161	44.9101	0.801031	39.4742	0.54427	58.9606	14.2838	14.1639	57.0471	50.7898	17.7024	53.8304	22.014	0.0466404	56.1618	13.5883	6.20081
	76	200.613	101.532	109.987	72.3951	106.323	126.178	80.7689	10.8748	12.6389	148.542	113.46	-5.32692	82.4993	85.6553	158.892	114.546	8.66907	52.027	170.07	120.329	135.701	89.3736	58.3727	119.434	65.241	127.407	157.046	151.207	108.938	9.84668	94.4677	15.9068	97.3051	1.73557	85.5273	1.17925	127.748	30.9482	30.6884	123.602	110.044	38.3552	116.633	47.6971	0.101054	121.684	29.4413	13.4351
	77	185.181	93.7218	101.527	66.8262	98.1439	116.472	74.5559	10.0383	11.6666	137.115	104.732	-4.91716	76.1532	79.0665	146.67	105.735	8.00221	48.025	156.988	111.073	125.263	82.4987	53.8825	110.247	60.2224	117.607	144.966	139.576	100.558	9.08924	87.2009	14.6832	89.8201	1.60206	78.9483	1.08854	117.921	28.5675	28.3278	114.094	101.58	35.4048	107.661	44.0281	0.0932809	112.324	27.1766	12.4016
	78	185.181	93.7218	101.527	66.8262	98.1439	116.472	74.5559	10.0383	11.6666	137.115	104.732	-4.91716	76.1532	79.0665	146.67	105.735	8.00221	48.025	156.988	111.073	125.263	82.4987	53.8825	110.247	60.2224	117.607	144.966	139.576	100.558	9.08924	87.2009	14.6832	89.8201	1.60206	78.9483	1.08854	117.921	28.5675	28.3278	114.094	101.58	35.4048	107.661	44.0281	0.0932809	112.324	27.1766	12.4016
	79	185.181	93.7218	101.527	66.8262	98.1439	116.472	74.5559	10.0383	11.6666	137.115	104.732	-4.91716	76.1532	79.0665	146.67	105.735	8.00221	48.025	156.988	111.073	125.263	82.4987	53.8825	110.247	60.2224	117.607	144.966	139.576	100.558	9.08924	87.2009	14.6832	89.8201	1.60206	78.9483	1.08854	117.921	28.5675	28.3278	114.094	101.58	35.4048	107.661	44.0281	0.0932809	112.324	27.1766	12.4016
	80	183.522	93.1383	101.172	66.7684	97.9582	116.471	72.31	10.1187	9.92494	136.533	104.694	-7.11112	76.0489	79.039	146.775	105.882	8.0514	47.8201	156.131	111.07	125.236	82.2322	54.0485	110.272	58.5354	116.44	145.071	138.934	100.602	9.12413	87.3332	14.7532	89.911	1.58766	78.9581	1.09735	117.924	29.2902	28.4033	114.298	101.582	33.7537	107.447	43.596	0.107837	112.326	27.2763	12.4223
	81	194.238	96.4619	103.357	67.2133	99.1385	116.457	85.9231	9.54814	20.4229	140.266	104.814	5.99435	76.5193	79.0864	146.206	104.88	7.74204	49.2452	161.566	110.981	125.294	83.6548	53.1838	109.946	68.5793	123.862	144.87	143.003	100.195	8.92338	86.3157	14.3597	89.2296	1.69827	78.7669	1.03713	117.875	22.741	27.9269	112.925	101.454	43.7363	108.229	46.2361	0.0306848	112.251	26.6887	12.317
	82	212.226	104.594	107.464	67.3191	101.046	116.258	116.154	9.07404	42.5113	146.446	105.627	34.5792	78.5654	79.5987	144.347	103.371	7.20732	51.267	171.187	111.339	125.981	87.9087	50.2564	110.246	90.6684	137.91	141.216	150.256	100.048	8.44088	85.6514	13.2868	88.4881	1.73735	79.1846	0.994624	117.777	26.4561	27.0813	110.808	101.826	64.5768	113.178	52.013	-0.207282	112.347	25.3311	11.9053
	83	217.484	116.437	111.543	66.958	102.833	117.928	129.685	9.04046	64.0081	150.043	109.044	62.9706	83.0182	84.3473	142.727	104.496	6.71944	48.0587	176.575	114.091	128.697	94.6247	46.5125	114.188	113.342	138.396	132.944	154.009	103.522	7.81931	88.4141	12.1473	90.9915	1.64987	81.7932	0.776064	119.251	47.1482	26.4313	111.997	104.302	84.1097	126.463	53.822	-0.593603	113.865	23.9348	11.6118
	84	208.825	135.422	120.03	67.7036	106.682	124.509	133.006	8.29121	89.7123	153.552	117.759	97.4804	91.0373	95.2921	143.656	110.412	5.86265	40.679	178.987	121.036	135.911	105.949	42.2188	125.209	142.172	126.709	119.259	155.272	113.509	6.71666	94.6782	10.9132	98.4187	1.35691	88.8835	0.692242	125.198	69.2935	26.1746	119.097	111.486	106.296	150.044	53.0935	-1.04087	119.871	22.8496	11.5124
	85	186.329	160.905	135.2	71.2591	114.912	137.676	145.524	7.63941	121.955	158.881	133.871	125.121	101.269	111.271	148.871	121.736	4.80902	33.2853	179.817	134.088	149.981	117.603	37.5845	145.728	168.615	112.033	100.154	154.791	131.668	5.51672	105.619	9.4864	111.955	0.747188	102.374	0.606583	138.243	97.2743	26.6334	134.299	124.941	134.628	181.746	53.9135	-1.31354	133.109	22.3453	11.6637
	86	154.469	186.77	155.266	77.8345	127.001	156.572	163.612	7.06473	148.855	167.193	155.973	146.463	112.618	131.088	157.224	135.573	3.95203	26.6746	180.327	153.28	168.83	129.456	33.5839	173.925	192.061	96.8571	80.6958	153.268	156.711	4.465	120.644	8.19859	130.21	0.0226379	120.455	0.22012	157.359	131.41	27.2382	156.054	141.237	158.739	214.172	55.0433	-1.43799	152.136	22.031	12.0796
	87	119.837	204.696	175.765	85.0238	138.517	175.803	181.58	5.82724	166.708	175.735	180.143	173.567	124.63	150.837	164.181	146.37	3.1366	21.3519	179.871	174.067	187.197	144.192	30.2616	203.115	217.154	82.973	63.7312	150.384	184.565	3.4309	133.56	7.08289	147.708	-0.844035	139.407	-0.014519	177.323	159.933	27.2739	178.243	155.684	174.027	237.58	55.7819	-1.4621	172.479	21.829	12.3615
	88	87.9611	207.05	189.598	90.013	144.417	187.346	192.344	4.55731	180.262	178.889	200.188	198.087	133.223	160.743	164.002	148.574	2.24398	16.7253	175.419	189.665	199.655	155.999	26.0679	224.535	232.866	69.6478	48.3629	144.447	208.162	2.31106	138.509	5.62994	158.035	-1.90102	155.838	0.0558512	191.293	177.756	26.0923	193.737	163.21	183.857	242.506	54.061	-1.18197	187.802	20.9213	11.9777
	89	61.4493	189.242	190.499	90.0769	140.46	185.433	189.334	3.7182	182.409	172.182	208.605	212.362	134.312	156.342	152.557	138.217	1.51113	12.8817	163.242	194.28	198.734	159.285	20.7687	229.82	231.587	56.7103	35.541	132.421	219.378	1.89069	133.946	4.14635	156.32	-2.49759	163.334	-0.0406236	192.875	187.365	23.0815	196.065	158.234	181.407	223.584	48.5121	-0.673227	190.503	18.5994	10.5939
	90	41.2532	153.589	175.194	82.9799	124.128	167.055	169.206	2.70673	169.9	152.611	199.336	209.679	125.514	139.284	128.922	115.132	0.888614	9.82528	141.133	182.512	179.705	152.286	15.4648	213.091	209.385	44.2306	26.1569	112.491	212.142	1.68734	118.157	2.76549	139.894	-2.66208	155.94	-0.151593	177.381	182.149	18.2944	179.932	138.09	163.136	183.06	39.8218	-0.441666	175.518	15.0825	8.43814
	91	27.129	109.896	147.73	70.3958	99.0677	135.873	136.705	1.78647	146.407	123.163	176.434	192.404	108.846	112.235	97.9652	85.4545	0.383956	6.88397	112.28	157.18	148.442	136.938	10.2112	179.048	170.573	32.2767	18.4405	88.1257	190.199	1.15001	93.9336	1.37184	112.637	-2.62382	137.498	-0.0511827	148.502	164.352	13.0574	149.496	110.149	132.341	132.47	29.7388	-0.26534	147.197	11.0055	5.61637
	92	16.8341	67.7789	111.41	53.4555	69.4423	97.116	97.2895	1.36669	113.396	87.6636	140.381	158.968	84.4501	78.6936	65.0774	55.1658	-0.185222	4.1269	79.2937	121.502	109.585	110.314	5.74318	132.648	122.087	20.5722	11.2424	61.701	153.245	0.4738	65.9433	-0.10799	79.6067	-2.22026	108.409	-0.313814	109.694	133.877	8.03744	109.419	78.3093	94.9451	83.1103	19.6116	-0.397175	109	6.49727	3.04238
	93	10.5231	39.4567	86.7728	41.9427	49.2325	71.0003	70.3732	0.823287	91.0313	63.4834	115.158	135.882	67.8955	56.9343	42.8316	34.5902	-0.513453	2.4969	56.7428	96.886	82.3517	92.0434	2.90774	100.937	89.4426	12.7389	6.7495	43.4626	127.631	0.211123	47.7682	-0.92181	57.2849	-1.81592	88.1459	-0.403684	83.28	113.154	4.64386	82.1425	55.5717	69.7147	49.6051	12.7326	-0.596146	82.4651	3.53967	1.36215
	94	4.76867	16.0588	56.9935	27.2445	26.5012	40.44	39.7043	0.75971	62.7902	35.368	81.224	101.816	45.4244	32.7448	21.0244	15.8004	-1.19173	0.936234	31.4444	65.9986	51.1934	66.3543	1.69105	60.5829	51.1747	5.06863	2.47553	24.0145	92.0168	-0.982606	26.893	-2.35828	31.3249	-1.50421	59.2284	-0.958573	49.5771	84.1586	1.59986	47.3343	31.9401	40.8182	21.3482	6.89428	-1.55236	49.2815	0.219629	0.329839
	95	0.156729	0.074506	12.7449	5.76179	3.01077	5.79525	5.68584	0.463519	15.3876	4.62992	20.5486	28.5245	10.1301	4.63803	1.69073	0.846427	-0.834504	-0.162652	4.15711	15.9654	10.4147	17.4062	0.592795	10.0953	7.53966	-0.419809	-0.435377	3.4629	24.1394	-1.09603	3.63794	-1.67998	3.73092	-0.593893	13.2493	-0.711133	7.88627	23.5198	-0.291816	6.65447	5.23609	6.76573	0.785986	1.09999	-1.15213	8.20961	-1.1844	-0.0255898
	dRFU (86-95°C)	524.381	1174.61	1301.97	624.728	921.777	1222.43	1245.83	29.0739	1277.15	1160.92	1477.99	1557.75	947.043	1023.54	995.475	875.723	9.39141	101.74	1123.91	1351.34	1336.11	1164.27	147.293	1527.8	1523.87	420.655	292.96	913.778	1568.19	13.5413	882.992	24.127	1016.75	0	1141.5	0	1295.17	1357.67	149.027	1299.08	1037.66	1205.75	1388.22	323.297		1274.59	118.541	65.776
TapeStation	ng (300-700 bp)	3.46	5.03	3.72	0.34	4.45	4.25	4.18	0.04	4.23	5.56	6.45	6.99	2.18	4.81	3.71	3.35		0.34	6.12	7.51	4.88	4.49	0.64	5.11	6.67	2.13	1.83	4.98	6.49	0.04	2.09	0.07	4.31		4.32		5.18	5.99	0.36	3.86	4.47	4.15	5.41	0.93		5.72	0.19	0.1
NanoDrop	ng/uL	21.57	18.92	18.65	10.48		23.34	24.88	6.53	22.09	29.58	28.28	35.34	18.97	29.78	18.23	16.04	6.77	8.1	36.76	31.36	23.75	27.42	13.39	36.17	39.04	17.89	14.92	27.51	31.46	10.45	23.48	10.19	28.94	9.06	25.7	8.58	28.28	33.64	10.06	30.46	30.25	31.16	27.24	10.67		35.66	8.71	9.74
	ng/uL (blank)	0.22	0.39	-0.11
[truncated: 24 more columns]
