# Supplementary material for: Use of the melting curve assay as a means for high-throughput quantification of Illumina sequencing libraries
Source: PeerJ. 2016 Aug 4;4:e2281. doi: 10.7717/peerj.2281 (PMC4991867; doi:10.7717/peerj.2281)
Supplement: Supplemental Information 2 — Sample unique identifier shows location in a 96-well microtiter plate during the MC assay. NTC stands for ‘no-template control’. Single libraries were pooled according to the MC assay-based method. The D7 sample was not pooled, due to failure of library preparation. [file peerj-04-2281-s010.xlsx]

## Sheet: MC-Endo60-admin_2015-06-17 11-5
Method		Sample
MC assay	Temperature	(NTC)	A1	A2	A3	A4	A5	A6	A7	A8	A9	B1	B2	B3	B4	B5	B6	B7	B8	B9	C1	C2	C3	C4	C5	C6	C7	C8	C9	D1	D2	D3	D4	D5	D6	D7	D8	D9 (NTC)	E1	E2	E3	E4	E5	E6	E7	E8	F1	F2	F3
	75	-0.191157	78.432	62.4702	54.5454	8.28671	78.6759	61.813	51.7107	52.8545	71.5102	93.2454	47.1169	64.0675	74.9931	89.5079	63.8558	74.3827	23.4036	16.0213	73.663	64.9323	62.551	60.2108	79.3477	88.4288	54.1931	77.5007	82.1436	76.896	52.2019	34.8717	55.8941	86.1931	80.2934	1.6357	62.9171	1.17535	42.9935	80.6414	26.9113	60.8371	77.7863	78.0417	77.2234	49.4707	68.1525	56.1087	40.588
	76	-0.414174	169.936	135.352	118.182	17.9545	170.464	133.928	112.04	114.518	154.939	202.032	102.087	138.813	162.485	193.934	138.354	161.162	50.7077	34.7127	159.603	140.687	135.527	130.457	171.92	191.596	117.418	167.918	177.978	166.608	113.104	75.5554	121.104	186.752	173.969	3.54403	136.32	2.54659	93.1526	174.723	58.3078	131.814	168.537	169.09	167.317	107.186	147.664	121.569	87.9407
	77	-0.382314	156.864	124.94	109.091	16.5734	157.352	123.626	103.421	105.709	143.02	186.491	94.2337	128.135	149.986	179.016	127.712	148.765	46.8071	32.0425	147.326	129.865	125.102	120.422	158.695	176.858	108.386	155.001	164.287	153.792	104.404	69.7434	111.788	172.386	160.587	3.27141	125.834	2.3507	85.987	161.283	53.8225	121.674	155.573	156.083	154.447	98.9414	136.305	112.217	81.176
	78	-0.382314	156.864	124.94	109.091	16.5734	157.352	123.626	103.421	105.709	143.02	186.491	94.2337	128.135	149.986	179.016	127.712	148.765	46.8071	32.0425	147.326	129.865	125.102	120.422	158.695	176.858	108.386	155.001	164.287	153.792	104.404	69.7434	111.788	172.386	160.587	3.27141	125.834	2.3507	85.987	161.283	53.8225	121.674	155.573	156.083	154.447	98.9414	136.305	112.217	81.176
	79	-0.382314	156.864	124.94	109.091	16.5734	157.352	123.626	103.421	105.709	143.02	186.491	94.2337	128.135	149.986	179.016	127.712	148.765	46.8071	32.0425	147.326	129.865	125.102	120.422	158.695	176.858	108.386	155.001	164.287	153.792	104.404	69.7434	111.788	172.386	160.587	3.27141	125.834	2.3507	85.987	161.283	53.8225	121.674	155.573	156.083	154.447	98.9414	136.305	112.217	81.176
	80	-0.374407	154.786	124.016	108.407	13.3307	156.641	123.031	103.715	105.072	142.192	185.88	94.3645	128.075	149.785	178.405	127.309	148.353	46.602	26.3386	146.51	128.732	124.159	120.27	158.497	176.618	107.972	153.918	162.583	153.144	104.257	69.854	111.621	172.347	160.442	3.25709	125.843	2.34778	82.8145	161.352	54.6995	121.648	155.418	156.293	154.178	100.08	136.151	111.997	81.2903
	81	-0.381747	167.113	129.597	112.743	32.9943	161.229	126.853	102.019	109.288	147.61	189.589	93.6196	127.817	150.992	182.246	129.8	150.946	47.9462	60.9953	151.501	135.595	129.902	121.251	159.768	178.228	110.558	160.548	172.937	157.038	105.206	69.166	112.747	172.57	161.393	3.34615	125.814	2.35664	102.075	160.835	49.3424	121.803	156.374	155.167	155.664	93.1337	137.148	113.43	80.6083
	82	-0.768114	195.342	141.299	120.289	73.9595	168.698	133.165	97.7514	115.543	155.812	197.345	91.688	132.2	153.521	189.17	134.58	155.364	50.0654	133.513	161.69	149.887	141.603	122.726	161.789	180.136	115.354	173.991	194.564	165.573	106.266	67.8988	114.127	173.036	162.682	3.53824	125.431	2.47266	144.875	160.385	36.0471	122.012	158.157	151.676	159.565	78.777	138.687	115.633	79.0085
	83	-1.14721	221.338	152.456	125.169	109.707	171.899	136.291	91.2962	116.224	159.04	203.594	89.506	141.49	156.417	193.804	138.313	159.606	50.3808	194.91	169.508	162.693	152.092	123.494	163.185	181.54	118.714	184.799	212.427	172.752	109.879	66.6416	115.789	173.914	163.658	3.55939	125.376	2.48271	162.293	161.449	41.4647	122.766	159.79	147.118	166.181	64.6294	139.822	116.566	77.9981
	84	-1.01934	235.363	164.972	129.475	148.033	174.084	139.671	100.552	113.148	161.927	208.713	87.2625	151.648	160.713	198.57	142.737	167.042	49.2561	220.19	175.201	176.314	162.419	128.122	166.138	185.773	123.568	193.853	226.444	177.645	116.559	65.7654	110.268	177.016	166.782	3.11692	126.92	2.17297	160.585	164.488	64.3419	126.849	162.189	143.167	177.234	74.6903	141.603	117.946	78.3486
	85	-0.967848	235.246	184.546	135.524	174.913	182.389	148.959	130.076	106.255	169.845	215.709	87.2427	166.101	169.968	209.317	152.949	183.38	47.0848	210.739	175.433	196.076	167.321	139.328	176.399	198.017	135.785	201.515	233.725	183.176	126.008	67.0622	103.687	187.668	177.973	2.52114	133.983	1.804	168.274	173.448	87.8327	138.671	170.237	143.059	198.187	111.689	147.435	121.504	81.676
	86	-1.0216	227.236	214.308	147.743	192.744	201.839	167.928	167.449	95.3775	187.171	229.059	91.7139	191.117	186.334	231.024	171.626	214.074	43.5112	195.603	174.622	209.601	173.271	157.035	198.428	223.095	158.939	208.882	231.83	192.458	141.923	70.9479	110.273	210.705	200.216	2.08957	149.779	1.2185	187.047	192.761	116.048	160.168	188.758	148.922	231.414	153.284	162.241	127.76	88.8652
	87	-0.810364	207.749	246.984	167.887	219.9	230.301	195.016	212.757	82.7461	213.151	248.281	99.8595	209.266	208.21	261.17	195.324	254.889	39.3241	174.408	179.451	216.812	188.032	176.607	228.891	258.947	190.472	217.161	223.355	203.614	164.581	75.8269	127.073	244.094	231.437	1.54765	172.748	0.757297	215.443	221.581	147.629	189.43	215.679	159.544	269.04	200.09	186.203	136.192	98.2815
	88	-0.653867	177.54	273.655	191.63	252.503	261.769	224.835	260.486	70.5014	243.686	269.085	109.597	217.492	234.255	293.03	219.105	295.832	35.6057	155.613	186.908	230.398	205.99	197.422	262.847	298.101	223.653	225.412	212.003	214.657	185.142	80.0335	147.75	280.671	266.392	0.989184	199.46	0.586031	248.307	255.807	169.123	222.188	245.573	171.052	300.688	247.814	214.952	144.565	107.344
	89	-0.740074	154.76	287.315	213.421	284.971	288.646	249.63	294.239	58.9182	272.688	286.378	118.42	229.545	260.234	317.801	235.47	326.481	31.5083	139.906	191.881	242.777	221.512	214.335	292.81	330.397	250.442	229.178	197.792	222.94	199.9	81.8542	184.876	311.231	295.707	0.550347	224.764	0.226821	278.044	288.086	176.757	249.225	271.396	178.399	316.226	277.204	242.205	148.971	112.479
	90	-0.62971	138.34	273.801	224.791	305.026	297.109	257.326	300.924	47.5911	288.764	288.136	121.092	233.295	274.454	320.435	232.404	331.067	26.2032	121.113	196.151	241.249	228.395	217.361	302.9	340.788	258.098	221.165	177.143	218.682	206.842	77.8187	221.986	322.327	304.508	-0.0451421	238.173	-0.203695	290.832	306.297	172.767	257.958	280.15	174.404	302.831	277.184	256.285	144.2	108.781
	91	-0.57108	117.153	233.69	222.945	311.425	283.956	246.063	286.761	37.2632	289.165	271.827	115.963	222.775	275.872	298.437	210.5	306.69	20.2524	101.059	196.763	232.059	223.75	211.35	291.986	327.23	244.493	201.622	151.718	200.914	202.773	67.4953	236.735	310.688	292.643	-0.879945	238.14	-0.406284	284.758	308.425	154.919	249.549	269.354	158.595	261.506	259.196	253.955	129.354	95.9099
	92	-0.716349	92.5361	175.708	199	291.693	243.266	209.995	243.992	26.9789	265.256	230.2	100.471	207.917	255.158	247.324	169.731	250.288	13.626	78.8426	173.21	206.047	197.615	197.199	252.784	281.043	205.738	165.703	119.096	165.895	181.192	52.2443	222.054	266.912	252.233	-1.73237	218.138	-0.81319	250.596	285.295	123.795	215.916	231.254	129.503	197.686	217.996	224.888	102.949	74.1554
	93	-0.661316	83.4833	135.251	182.671	277.843	215.728	185.277	215.087	20.9932	248.794	202.906	90.2527	203.018	240.873	212.735	141.02	212.106	9.24681	64.7196	160.975	187.52	179.117	185.918	225.821	249.486	179.184	141.897	98.7025	142.963	167.459	42.3165	217.124	238.073	223.677	-2.24098	203.925	-1.26582	227.096	268.619	103.048	192.082	205.636	109.968	154.137	190.096	205.349	85.9238	59.5408
	94	-0.848806	59.7748	78.3348	150.013	248.267	165.64	140.03	161.935	12.0916	218.068	152.352	71.8169	195.11	212.095	152.733	96.0076	145.78	3.07941	41.6545	127.81	148.558	145.81	175.933	174.56	191.738	131.798	102.023	66.7309	102.129	145.506	27.5256	178.35	182.724	172.166	-3.2115	177.908	-1.79291	181.101	239.217	70.1533	147.766	156.669	79.1256	90.9472	142.944	163.593	57.1712	36.1038
	95	-0.484587	12.8468	10.814	47.5491	89.4876	47.0543	38.4886	44.1263	1.34471	77.1643	41.0792	21.8729	79.1009	75.2086	37.8845	21.6308	32.3483	-1.12774	8.23464	35.9215	43.9014	46.3212	71.2441	50.0256	54.415	34.3581	25.4985	14.4438	24.7543	50.5174	5.5961	52.4522	51.2776	49.0937	-1.75736	62.6718	-0.98563	54.7626	86.975	15.6959	41.9684	43.3844	20.1499	12.8955	39.4845	48.8029	11.5727	5.40164
	dRFU (86-95°C)	-7.13775	1271.42	1929.86	1747.65	2473.86	2235.31	1914.59	2187.76	453.806	2303.91	2219.3	941.06	1988.64	2222.69	2372.57	1692.82	2369.56	221.229	1081.15	1623.69	1958.92	1809.81	1804.4	2281.05	2555.24	1877.18	1738.54	1492.82	1689.01	1645.84	581.659	1698.67	2418.7	2288.07	-4.69055	1885.71	-2.67887	2217.99	2453.06	1249.94	1926.25	2107.85	1329.66	2137.37	2005.29	1958.48	1088.66	786.862
	Volume to pool (uL)		3.14609	2.07269	2.28879	1.61691	1.78946	2.08922	1.82836	8.81434	1.73618	1.80237	4.25053	2.01143	1.79962	1.68593	2.36292	1.68808	18.0808	3.69975	2.46352	2.04194	2.21017	2.2168	1.75358	1.56541	2.13086	2.30078	2.6795	2.36826	2.43038	6.87688	2.35478	1.65378	1.7482		2.12122		1.80344	1.63061	3.20016	2.07657	1.89767	3.00828	1.87146	1.99472	2.04241	3.67425	5.08348
MiSeq	PRN		2.57009	1.6303	1.60664	0.87215	1.58173	1.42906	1.26957	1.80623	1.55513	1.35344	0.773522	1.37846	1.1579	1.39585	1.78808	1.46601	1.47829	2.30282	1.88367	1.56492	1.99688	1.31715	1.52651	1.19733	1.62525	2.33761	3.26932	1.70052	1.65166	0.798115	1.28163	1.36739	1.08889		1.54384		1.32316	1.2558	1.07706	1.30293	1.51246	0.45283	1.387	1.60827	1.53488	1.46681	1.05388
[truncated: 21 more columns]

## Sheet: Sheet1
	Cycle	A1	A2	A3	A4	A5	A6	A7	A8	A9	B1	B2	B3	B4	B5	B6	B7	B8	B9	C1	C2	C3	C4	C5	C6	C7	C8	C9	D1	D2	D3	D4	D5	D6	D7	D8	D9	E1	E2	E3	E4	E5	E6	E7	E8	F1	F2	F3	F4
	1	3893.11	3856.99	3596.85	3496.76	4665.41	4513.05	4901.73	2694.55	4764.93	4709.43	4489.4	4821.33	4077.68	3513.89	3555.75	3228.82	2691.17	2740.98	5009.42	3582.23	3230.89	4286.56	4747.05	4661.12	4924.97	2943.38	2841.58	5038.69	4677.55	2734.64	4570.28	4975.66	5135.21	2657.99	4981.91	2657.54	5223.34	4958.75	2750.88	4462.79	5021.6	4961.37	4136.45	2804.26	5007.62	2706.03	2725.55	5095.91
	2	4011.96	3976.53	3698.13	3573.52	4799.85	4647.51	5053.06	2704.11	4940.38	4903.86	4657.58	4941.1	4181.23	3601.16	3644.25	3313.28	2704.87	2756.25	5226.45	3667.63	3297.39	4399.24	4947.75	4800.94	5094.56	2984.72	2868.03	5219.26	4805.59	2744.2	4690.83	5104.72	5292.3	2665.7	5145.52	2661.23	5401.24	5105.81	2765.69	4566.29	5172.29	5099.3	4265.65	2839	5158.71	2726.09	2734.12	5242.46
	3	4111.39	4077.95	3784.24	3607.47	4897.69	4744.2	5131.32	2710.34	5030.04	5189.17	4711.42	5016.23	4262.1	3678.05	3736.4	3374.01	2708.49	2768.73	5341.19	3726.75	3363.86	4469.44	5031.27	4883.22	5198.11	3016.38	2892.28	5297.76	4902.66	2752.63	4768.13	5170.32	5369.93	2670.9	5239.67	2667.19	5494.67	5161.52	2772.85	4626.81	5251.13	5145.8	4359.62	2858.96	5230.76	2735.24	2738.78	5325.33
	4	4211.37	4196.02	3900.03	3643.85	5001.11	4829.54	5209.54	2713.51	5106.67	5258.79	4724.87	5065.52	4348.42	3768.87	3847.98	3456.74	2707.02	2783.37	5449	3787.29	3449.49	4549.18	5102.34	4957.31	5267.53	3059.96	2922.97	5371.63	5008	2752.16	4841.74	5217.32	5440.21	2673.19	5310.6	2669.49	5565.32	5211.42	2779.5	4676.44	5320.42	5154.38	4479.1	2883.46	5281.95	2744.51	2748.48	5396.85
	5	4384.62	4359.28	4066.73	3698.99	5114.31	4948.89	5292.95	2724.11	5198.08	5353.71	4740.65	5149.89	4474.86	3918.44	4018.26	3580.48	2716.03	2811.76	5553.24	3891.09	3591.22	4668.43	5223.08	5063.99	5360.77	3132.98	2974.79	5450.68	5145.34	2761.35	4932.79	5295.11	5510.73	2679.42	5381.38	2672.79	5647.67	5275.87	2796.19	4758.04	5401.55	5175.92	4647.14	2926.46	5357.11	2763.05	2756.15	5493.87
	6	4633.5	4615.47	4328.24	3791.92	5296.24	5123.08	5412.16	2742.18	5317.19	5501.39	4769.88	5269.94	4656.53	4163.65	4288.71	3782.44	2722.94	2850.44	5693.78	4064.2	3837	4851.94	5391.94	5232.96	5504.03	3257.75	3067.76	5569.06	5342.03	2767.96	5076.45	5386.16	5620.51	2684.48	5480.14	2677.96	5750.09	5382.92	2822.33	4886.73	5527.61	5209.39	4911.62	3000.2	5465.88	2796.61	2766.69	5633.36
	7	5017.23	4978.39	4729.41	3927.8	5570.46	5363.92	5584.38	2759.99	5493.25	5694.25	4802.98	5452	4930.93	4543.06	4708.86	4116.43	2738.07	2926.42	5888.68	4348.48	4239.74	5124.31	5640.75	5474.94	5706.56	3484.88	3226.92	5735.46	5624.33	2781.83	5284.24	5543.82	5781.38	2688.14	5619.49	2678.98	5943.33	5519.21	2860.72	5083.44	5703.77	5257.51	5288.82	3118.69	5632.25	2849.47	2798.43	5828.35
	8	5506.85	5440.51	5289.46	4166.02	5950.33	5703.85	5848.77	2811.02	5740.44	5971.74	4854.24	5711.34	5345.81	5091.55	5291.72	4626.42	2762.91	3059.21	6164.31	4773.33	4849.51	5506.91	5992.28	5806.43	5995.7	3880.59	3514.01	5963.81	5999.84	2806.93	5597.58	5754.19	6012.14	2691.2	5820.7	2683.59	6137.1	5723.8	2939.62	5374.56	5956	5326.75	5796.88	3329.85	5860.83	2956.89	2842.13	6092.71
	9	6038.29	5967.33	5955.94	4553.01	6404.69	6124.38	6180.67	2890.7	6096.09	6282.64	4927.63	6035.95	5884.31	5745.63	5963.56	5298.18	2802.85	3306.99	6479.16	5347.35	5629.76	5967.23	6397.9	6182.71	6354.01	4484.5	4014.47	6229.51	6420.61	2854.55	6010.07	6046.14	6305.81	2695.59	6110.27	2678.85	6402.08	5981.93	3078.54	5764.01	6266.9	5414.67	6393.1	3704.3	6153.71	3145.45	2929.65	6413.6
	10	6446.23	6385.62	6560.65	5124.2	6830.69	6509.65	6570.94	3048.36	6513.4	6566.68	5032.18	6357.38	6447.89	6342.9	6553.1	6011.94	2877.44	3730.87	6786.74	5935.68	6393.58	6370.85	6759.1	6513.85	6720.34	5268.81	4784.7	6484.32	6768.73	2940.41	6456.87	6377.83	6648.49	2696.97	6465.65	2682.03	6704.11	6245.12	3335.26	6171.22	6608.08	5515.81	6915.06	4288.42	6448.37	3483.84	3093.54	6708.16
	11	6641.02	6582.84	6892.73	5794.76	7099.4	6752.68	6864.89	3318.47	6882.18	6749.78	5167.08	6581.45	6820.63	6704.16	6887.38	6551.32	3018.37	4376.75	6973.75	6357.66	6905.12	6587.12	6960.47	6701.38	6965.81	6030.99	5732.29	6645.75	6938.13	3103.03	6786.06	6643.84	6929.48	2697.02	6823.76	2690.23	6948.65	6430.5	3779.32	6462.25	6852.01	5598.67	7169.63	5079.05	6662.34	4040.53	3376	6896.89
	12	6726.18	6631.36	6998.24	6362.47	7219.28	6850.52	7044.24	3800.28	7106.43	6829.31	5346.52	6687.9	6973.22	6857.31	7016.61	6799.08	3277.65	5195.29	7061.5	6555.78	7116.3	6645.27	7022.44	6760.65	7078.8	6549.82	6601.79	6739.34	6975.95	3393.2	6934.91	6795.79	7082.98	2708.69	7069.29	2694.78	7097.21	6511.55	4480.31	6596.52	6987.73	5656.79	7248.05	5888.16	6758.56	4831.47	3871.88	6988.62
	13	6752.77	6608.69	6984.87	6656.06	7213.14	6851	7099.96	4529.73	7175.39	6845.28	5540.16	6720.6	6975.12	6871.18	7024.73	6859.46	3734.58	5962.69	7089.19	6584.49	7121.26	6640.72	7004.96	6759.88	7104.59	6761.48	7126.35	6756.93	6989.36	3900.86	6951.54	6829.75	7124.68	2711.57	7166.47	2696.58	7127.38	6535.24	5369.63	6612.79	7014.56	5684.26	7222.49	6478.29	6775.6	5698.08	4599.71	6994.48
	14	6975.9	6760.58	7186.68	7048.09	7430.14	7053.57	7325.32	5453.28	7420.17	7052.62	6004.82	6948.05	7258.44	7094.9	7238.32	7083.24	4469.3	6576.64	7290.8	6804.07	7342.97	6871.77	7204.86	6948.36	7324.97	7041.99	7575.08	6937.51	7178.55	4671.12	7197.94	7040.5	7336.78	2723.77	7430.53	2701.08	7340.74	6712.06	6271.57	6837.64	7211.62	5916.72	7423.21	6942.39	6939.37	6444.91	5481.37	7198.65
	MC plate	A2	A3	A4	A5	A6	A7	A8	A9	A10	B2	B3	B4	B5	B6	B7	B8	B9	B10	C2	C3	C4	C5	C6	C7	C8	C9	C10	D2	D3	D4	D5	D6	D7	D8	D9	D10	E2	E3	E4	E5	E6	E7	E8	E9	F2	F3	F4	F5
	Original plate	A1	A2	A3	A4	A5	A6	A7	A8	A9	B1	B2	B3	B4	B5	B6	B7	B8	B9	C1	C2	C3	C4	C5	C6	C7	C8	C9	D1	D2	D3	D4	D5	D6	D7	D8	D9 (NC)	E1	E2	E3	E4	E5	E6	E7	E8	F1	F2	F3	F4
		1044.18	1715.55	1599.91	2281.11	2033.47	1746.66	2020.31	358.428	2116.74	1990.24	849.346	1797.52	2036.36	2141.55	1521.19	2155.48	177.718	885.55	1449.07	1749.32	1636.54	1647.37	2082.62	2332.14	1718.24	1529.66	1260.98	1496.55	1503.91	510.711	1588.4	2208	2087.86	-6.78012	1735.93	-3.89737	2030.94	2260.3	1133.89	1766.08	1919.09	1180.74	1905.96	1852.01	1796.23	960.898	697.997	1910.58
	Temperature	A2	A3	A4	A5	A6	A7	A8	A9	A10	B2	B3	B4	B5	B6	B7	B8	B9	B10	C2	C3	C4	C5	C6	C7	C8	C9	C10	D2	D3	D4	D5	D6	D7	D8	D9	D10	E2	E3	E4	E5	E6	E7	E8	E9	F2	F3	F4	F5
	86	3747.92	4411.77	4286.37	5070.66	4746.88	4428.15	4701.67	2986.7	4883.25	4723.64	3493.05	4609.74	4789.06	4858.61	4189.04	4856.16	2789.07	3576.97	4125.61	4522.99	4333.73	4397.84	4782.75	5054.2	4384.59	4249.08	3971.16	4188.62	4196.93	3134.04	4248.81	4923.16	4792.44	2584.51	4451.56	2586.17	4728.73	5068.26	3779.76	4441.38	4622.87	3874.83	4605.77	4541.22	4473.78	3614.95	3341.3	4603.93
[truncated: 20 more columns]
