# Supplementary material for: Use of the melting curve assay as a means for high-throughput quantification of Illumina sequencing libraries
Source: PeerJ. 2016 Aug 4;4:e2281. doi: 10.7717/peerj.2281 (PMC4991867; doi:10.7717/peerj.2281)
Supplement: Table S1 — Details of the cost and processing duration assumption for the library normalisation or quantification methods. Price information for the major reagents was obtained from the websites of suppliers. Micropipette tips and 96-well microtiter plates are included in the consumables, and the per-sample cost for each of those was estimated as US0.04. SPRI denotes the SPRI bead-based DNA size-selection and/or purification. [file peerj-04-2281-s006.xlsx]

## Sheet: Supplementary Table2
Method	Sample number	Per-sample cost and required item				Processing time for 92-96 samples			Advantage (+), disadvantage (-), and note
		Total cost (US$)	Items required	Cost (US$)		Total processing time	Procedure	Processing time
SequalPrep	96	0.91				1h30min			(+) Relatively low cost and short processing time. Simple library pooling after SequalPrep.
									(-) At least 250 ng DNA required from each library. Libraries may not be normalised when the DNA concentration is too low.
									Note: The total cost and processing time defined in the references 3 and 7
BeNUS	96	1.04	AMPure XP beads	0.6		1h30min	Sample preparation	10min	(+) Relatively low cost and short processing time. Simple library pooling after BeNUS.
			Consumables	0.44			First SPRI	40min	(-) Libraries may not be normalised when the DNA concentration is too low.
							Second SPRI	40min
qMiSeq	93	~10				c. 1 day	Pooling and SPRI	45 min	(+) High accuracy. A larger sample number (e.g. 384) can be simultaneously processed.
							Library characterisation	30 min	(-) High cost and long processing time, especially for a small sample number. Re-pooling required after quantification.
							Sample loading on MiSeq	30 min	Note: The total cost defined in the reference 10
							MiSeq run	5h30min
							Data analysis	60min
TapeStation	96	2.75	TapeStation tape and reagent	2.67		2h15min	Sample preparation	15min	(+) High size-specificity. Suitable for a small sample number (e.g. less than 20).
			Consumables	0.08			TapeStation run	110min	(-) Relatively high cost
							Data analysis	10min
SPRI + real-time PCR	92	1.41	AMPure XP beads	0.12		4h50min	SPRI	40min	(+) Library specificity
	(46 samples x 2 runs)		Reagents for real-time PCR	0.67			qPCR (2 runs)	4h	(-) Long processing time
			Consumables for SPRI	0.32			Data analysis	10min	Note: 2 replications for each sample. Positive and negative control samples included in each run. Cost and processing time on a 96-well format instrument. The cost for real-time PCR reagents defined in the reference 1.
			Consumables for real time PCR	0.3
SPRI + NanoDrop	96	0.48	AMPure XP beads	0.12		1h50min	SPRI	40min	(+) Low cost. Suitable for a small sample number (e.g. less than 20).
			Consumables	0.36			NanoDrop	60min	(-) 'Over-estimation issue' of the NanoDrop-based quantification
							Data analysis	10min
MC assay	96	0.15	SYBR Green I	0.01		40min	Sample preparation	15min	(+) Low cost and short processing time.
			Consumables	0.14			MC assay	15min	(-) Relatively large volume of PCR products (20 µl) required
							Data analysis	10min	Note: Cost and processing time on a 96-well format instrument
